Anesthesiology  
65:567, 1986

### Involvement in Prehospital Care by Anesthesiologists

*To the Editor:*—The Committee on Acute Medicine of the American Society of Anesthesiologists is interested in developing information about anesthesiologists actively involved in prehospital care (including disaster planning) or in the organization of hospital-based trauma care.

Anesthesiologists so involved are requested to identify themselves to the author at the following address.

THOMAS J. POULTON, M.D.  
*Associate Professor and Vice Chairman*  
*Department of Anesthesiology*  
*Creighton University/Saint Joseph Hospital*  
*601 North 30th Street*  
*Omaha, Nebraska 68131*

*(Accepted for publication September 5, 1986.)*
